# Supplementary material for: A selective colorimetric strategy for probing dopamine and levodopa through the mussel-inspired enhancement of Fe3O4 catalysis
Source: Royal Society of Chemistry journal article supplement (doi:10.1039/c9cc06211d), 2019-01-01
Supplement: c9cc06211d1.pdf [file c9cc06211d1.pdf]

## Electronic Supplementary Information

### A Selective Colorimetric Strategy for Probing Dopamine and Levodopa through the Mussel-Inspired Enhancement of Fe<sub>3</sub>O<sub>4</sub> Catalysis

Mengyuan Yin<sup>a</sup>, Shuai Li<sup>a</sup>, Yuqi Wan<sup>a</sup>, Luping Feng<sup>b</sup>, Xiaoting Zhao<sup>a</sup>, Sheng Zhang<sup>a</sup>, Shuhui Liu<sup>a</sup>, Peng Cao<sup>a</sup>, Hua Wang<sup>\*,a,b</sup>

<sup>a</sup> Institute of Medicine and Materials Applied Technologies, College of Chemistry and Chemical Engineering, Qufu Normal University, Qufu City, Shandong Province 273165, P. R. China.

<sup>b</sup> School of Chemistry and Chemical Engineering, Harbin Institute of Technology, Harbin, Heilongjiang 150090, P. R. China.

\* Corresponding Author: E-mail addresses: [huawangqfnu@126.com](mailto:huawangqfnu@126.com); Tel: +86 537 4456306;

Fax: +86 537 4456306; Web: <http://wang.qfnu.edu.cn>.

#### Abstract

Supplementary information includes the experimental details of the materials and instruments, the synthesis of mesoporous Fe<sub>3</sub>O<sub>4</sub> nanoparticles (NPs), and colorimetric analysis tests. Figures or Tables are provided for the comparable dynamic studies on the catalysis activities of Fe<sub>3</sub>O<sub>4</sub> NPs with DA, the optimization of colorimetric analysis conditions, and the environmental robustness and storage stability of Fe<sub>3</sub>O<sub>4</sub> NPs, and the results of comparable dynamic studies on the catalysis activities of Fe<sub>3</sub>O<sub>4</sub> NPs with and without DA.

#### Experimental Section

##### Materials and reagents

Ferric chloride hexahydrate (FeCl<sub>3</sub>•6H<sub>2</sub>O), ethylene glycol (EG), ethanol, acetic acid, and hydrogen peroxide (H<sub>2</sub>O<sub>2</sub>) were purchased from Sinopharm Chemical Reagent Co. (China). Sodium acetate (NaAc), sodium chloride (NaCl), and sodium hydroxide (NaOH) were obtained from Tianjin Kermel Chemical Reagent Co., Ltd. Dopamine (DA) and levodopa (LDA) were obtained from Aladdin Reagent Co., Ltd. (Shanghai, China). 3,3',5,5'-tetramethylbenzidine (TMB), tyrosine, tyramine, adenosine triphosphate disodium salt (ATP), glycine (Gly), phenylalanine

(Phe), lysine (Lys), cysteine (Cys), glutathione (GSH), ascorbic acid (AA), tryptophan (Try), glutamic acid (Glu), urea, histidine (His), histamine, glucose were purchased from Sigma-Aldrich (Beijing, China). They were used as received without further purification. All other reagents are of analytical grade. Deionized water (18 M $\Omega$ ) was obtained from an ultra-pure water system (Pall, USA).

### **Apparatus**

High-resolution transmission electron microscopy (TEM, Tecnai G20, FEI) and scanning electron microscope (SEM, Hitachi E-1010, Horiba Ex-250) were employed to characterize the prepared catalytic materials like Fe<sub>3</sub>O<sub>4</sub> NPs. Moreover, colorimetric measurements were performed using Infinite M 200 PRO (TECAN, Switzerland) and UV-3600 spectrophotometer (Shimadzu, Japan).

### **Fabrication of catalytic Fe<sub>3</sub>O<sub>4</sub> NPs**

Mesoporous Fe<sub>3</sub>O<sub>4</sub> NPs were fabricated by the solvothermal route using FeCl<sub>3</sub>·6H<sub>2</sub>O and NaAc in EG solution. Briefly, 3.46 g of FeCl<sub>3</sub>·6H<sub>2</sub>O was dissolved in 70 mL EG to form a clear solution by intense stirring, followed by the addition of 4.62 g of NaAc. Further, the mixture was vigorously mixed by ultrasonication to give a homogeneous solution, and then transferred into a Teflon-lined stainless steel autoclave (100 mL capacity) to be heated at 200 °C for 8 h. After the autoclave was allowed to cool down to room temperature, the resulting black products of magnetite particles were collected by magnetic separation, and washed for several times under sonication separately with water and ethanol. Subsequently, the yielded mesoporous Fe<sub>3</sub>O<sub>4</sub> NPs were dried under vacuum at 60 °C for 12 h to be stored at room temperature.

### **Colorimetric analysis**

Colorimetric investigations of the peroxidase-like catalysis activities of mesoporous Fe<sub>3</sub>O<sub>4</sub> NPs in the absence and presence of DA were conducted using TMB-H<sub>2</sub>O<sub>2</sub> substrates in HAc-NaAc buffer (pH 3.6). Briefly, 5.0 mg Fe<sub>3</sub>O<sub>4</sub> NPs was dispersed in 1.0 mL water under ultrasonic conditions. An aliquot of the Fe<sub>3</sub>O<sub>4</sub> NPs suspensions, which concentration should be optimized, was added into 200  $\mu$ L of DA or LDA solutions with different concentrations to be mixed

thoroughly by vortex, and then incubated for 10 min. Furthermore, a magnetic field was applied to ensure the magnetic separation of DA or LDA-coated Fe<sub>3</sub>O<sub>4</sub> NPs. After being washed for three times with buffer, an aliquot of 200 μL TMB-H<sub>2</sub>O<sub>2</sub> substrates were introduced to be incubated for 20 min at 37 °C. Furthermore, colorimetric measurements were performed for the reaction products with absorbance values recorded. The optimization of catalytic reaction conditions was carried out with 96-well plates by following the same procedure under different reaction conditions, including different amounts of Fe<sub>3</sub>O<sub>4</sub> NPs (0.00050, 0.0010, 0.0025, 0.0050, 0.0075, 0.010 mg/mL), reaction temperature (4, 25, 37, 45, 60 °C), pH values (3.0, 4.0, 5.0, 6.0, 7.0, 8.0), and ionic strengths in NaCl concentrations (50, 100, 150, 200, 250, 300 mM). Moreover, comparable studies were conducted to explore the peroxidase-like activities of Fe<sub>3</sub>O<sub>4</sub> NPs (0.005 mg/mL) using different small molecules (DA, LDA, Tyrosine, ATP, Gly, Phe, Lys, Cys, GSH, AA, Try, Glu, Urea, His, Glucose, and UA) and different ions (Cu<sup>2+</sup>, Pb<sup>2+</sup>, Ni<sup>2+</sup>, Mn<sup>2+</sup>, Mg<sup>2+</sup>, Zn<sup>2+</sup>, Hg<sup>2+</sup>, Ag<sup>+</sup>, Cr<sup>3+</sup>, Co<sup>2+</sup>, Al<sup>3+</sup>, Na<sup>+</sup>, K<sup>+</sup>, Ca<sup>2+</sup>, S<sup>2-</sup>, Br<sup>-</sup>, H<sub>2</sub>PO<sub>4</sub><sup>-</sup>, SO<sub>4</sub><sup>2-</sup>, NO<sub>3</sub><sup>-</sup>, HCO<sub>3</sub><sup>-</sup>, HPO<sub>4</sub><sup>2-</sup>, CO<sub>3</sub><sup>2-</sup>, C<sub>2</sub>O<sub>4</sub><sup>2-</sup>, I<sup>-</sup>, Ac<sup>-</sup>, and Cl<sup>-</sup> ions), each with the concentration of 1.0×10<sup>-5</sup> M.

Moreover, steady-state kinetic studies were performed with 96-well plates for comparably exploring the catalysis activities of Fe<sub>3</sub>O<sub>4</sub> NPs in the absence and presence of DA, of which the H<sub>2</sub>O<sub>2</sub>-TMB reaction substrates were used alternatively at a fixed concentration of one substrate (10 mM H<sub>2</sub>O<sub>2</sub> or 5×10<sup>-4</sup> M TMB) and varying concentrations of the second substrate of TMB (10, 50, 100, 200, 400, 600, 800 μM) or H<sub>2</sub>O<sub>2</sub> (5.0, 10.0, 30.0, 50.0, 100, 150, 200 mM). Further, the dynamic catalysis parameters of Fe<sub>3</sub>O<sub>4</sub> NPs and DA-stimulated Fe<sub>3</sub>O<sub>4</sub> NPs were calculated by double-reciprocal plottings, including the Michaelis constant (K<sub>m</sub>) and the maximal reaction velocity (V<sub>max</sub>). In addition, colorimetric analysis experiments were carried out separately for different concentrations of DA or LDA in buffer (HAc-NaAc, pH 3.6) (0.010 to 10 μM) and spiked in urine (1.0 nM to 12 μM), so as to obtain the calibration detection curves for different DA or LDA concentrations in samples.

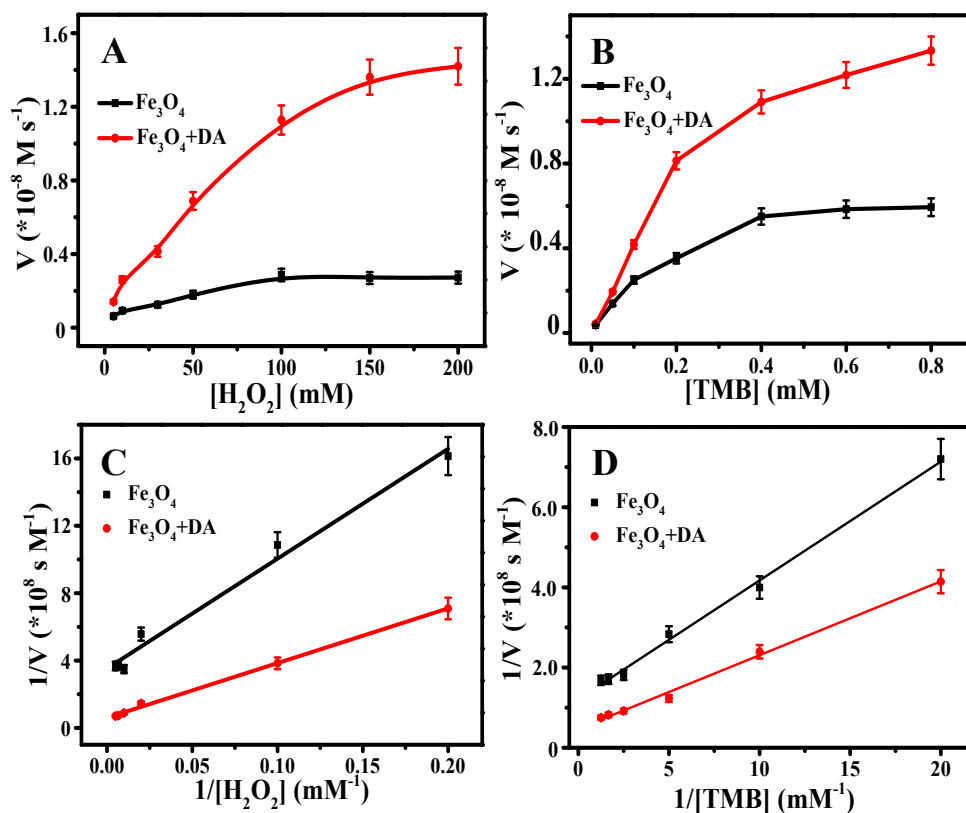

**Fig. S1** Colorimetric dynamic studies on the catalysis activities of Fe<sub>3</sub>O<sub>4</sub> NPs (0.0050 mg/mL) in the absence and presence of DA ( $1.0 \times 10^{-5}$  M) using (A) various H<sub>2</sub>O<sub>2</sub> concentrations and (B) various TMB concentrations, with (C) and (D) the corresponding double-reciprocal plots. The measurements were conducted alternatively at a fixed concentration of one substrate ( $5 \times 10^{-4}$  M TMB or  $1 \times 10^{-2}$  M H<sub>2</sub>O<sub>2</sub>) versus varying concentrations of the second substrate, with the details shown in the Experimental.

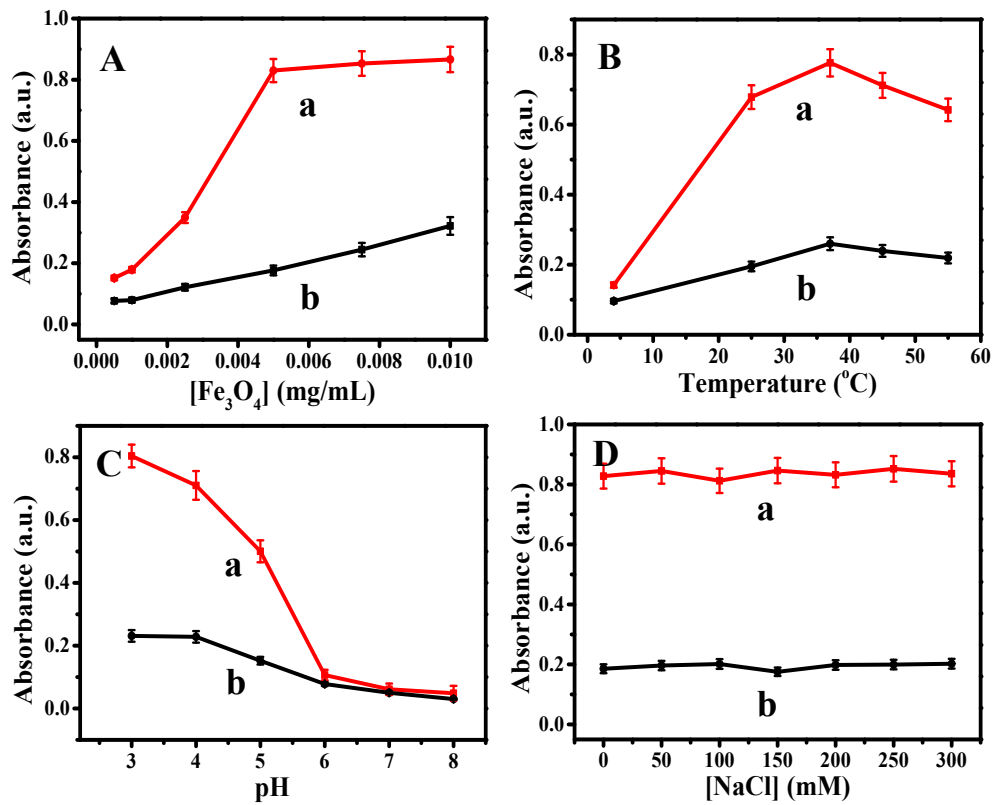

**Fig. S2** Comparable catalysis conditions of Fe<sub>3</sub>O<sub>4</sub> NPs (0.0050 mg/mL) in the (a) presence and (b) absence of DA ( $1.0 \times 10^{-5}$  M) for TMB-H<sub>2</sub>O<sub>2</sub> reactions under different (A) Fe<sub>3</sub>O<sub>4</sub> NPs concentrations, (B) temperature, (C) pH values, and (D) ionic strengths in NaCl concentrations.

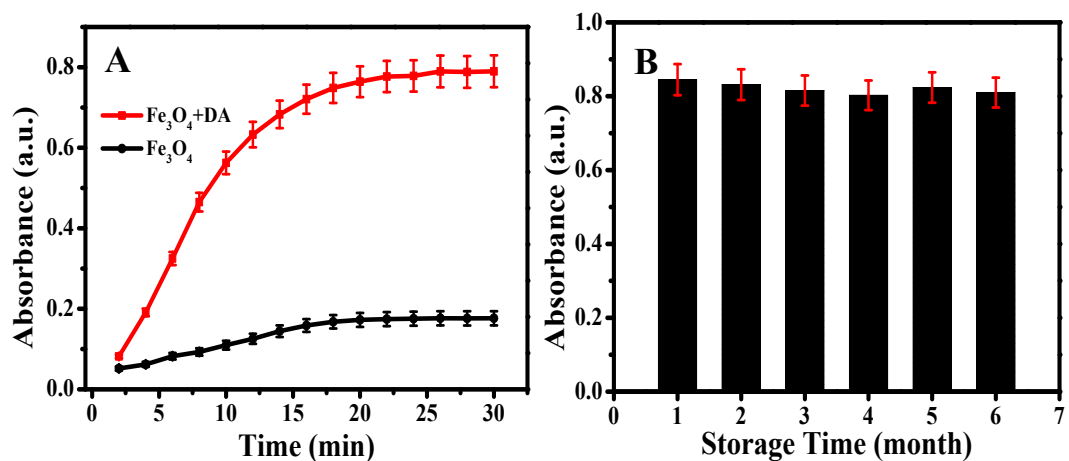

**Fig. S3** (A) The time-dependent catalysis of Fe<sub>3</sub>O<sub>4</sub> NPs (0.0050 mg/mL) with and without DA ( $1 \times 10^{-5}$  M) for TMB-H<sub>2</sub>O<sub>2</sub> reactions. (B) The environmental stability of Fe<sub>3</sub>O<sub>4</sub> NPs stored in room temperature over different time intervals, where the catalytic activities of Fe<sub>3</sub>O<sub>4</sub> NPs with DA were monitored by catalyzing the TMB-H<sub>2</sub>O<sub>2</sub> reactions.

**Table S1** Comparable results of catalysis parameters of dynamic studies on the catalysis performances of Fe<sub>3</sub>O<sub>4</sub> NPs with and without DA in catalyzing the TMB-H<sub>2</sub>O<sub>2</sub> reactions.

| Catalysis materials                    | Substrates                    | K <sub>m</sub> (mM) | V <sub>m</sub><br>(×10 <sup>-8</sup> M S <sup>-1</sup> ) | K <sub>cat</sub> (S <sup>-1</sup> ) |
|----------------------------------------|-------------------------------|---------------------|----------------------------------------------------------|-------------------------------------|
| Fe <sub>3</sub> O <sub>4</sub>         | TMB                           | 0.3923              | 2.13                                                     | 1.495×10 <sup>5</sup>               |
|                                        | H <sub>2</sub> O <sub>2</sub> | 18.48               | 0.2834                                                   | 0.199×10 <sup>5</sup>               |
| Fe <sub>3</sub> O <sub>4</sub> with DA | TMB                           | 0.2445              | 0.8255                                                   | 0.579×10 <sup>5</sup>               |
|                                        | H <sub>2</sub> O <sub>2</sub> | 54.04               | 1.66                                                     | 1.165×10 <sup>5</sup>               |
